# Supplementary material for: Integrating anatomy with surgery through basic suturing skills workshops: A pilot study at the University of Rwanda
Source: Research Square preprint supplement (doi:10.21203/rs.3.rs-8506753/v1), 2026-02-11
Supplement: Supplementary file 1 [file a1d1f4c93bc2d2d6c62bb34d.docx]

**Supplementary file 1 (Questionnaires)**

Basic surgical Skills Pre-course Evaluation

1. Name/Code _______________
2. Level/year of study ________________
3. Have you ever received any previous skill training on suturing and knot tying? (mark only one)

Yes No

1. Knowledge of anatomical layers of the skin (mark only one)

Yes No

1. Beneath the skin is the (mark only one)

- Superficial layer
- Deep layer
- Muscle layer

1. Using the following scale, rate your current suturing and knot tying skills (mark only one)
2. Being no skill: performance of suturing and knot tying will endanger or potentially endanger patient
3. Marginal skill (borderline): performance will give rise to concern, and patient safety will be potentially compromised
4. Acceptable (adequate): satisfactory performance but could be improved; patient safety will not be affected
5. Good (strong): performance is solid and meets expectations; patient safety is reasonably assured
6. Excellent (exceptional): extremely good performance which can serve as a model example to others and patient safety is enhanced
7. Which type of needle is best suited for suturing skin? (mark only one)

- Cutting
- Tapered
- Blunt
- Spatula

1. The horizontal mattress stitch is especially useful for (mark only one)

- Cosmetic closure
- Areas under tension (e.g over joints)
- Vascular anastomosis
- Deep fascia closure

1. Which type of forceps is most appropriate for handling delicate tissue during suturing (mark only one)

- Adson forceps with teeth
- Allis clamp
- Towel clip
- Kocher clamp

1. The vertical mattress suture is especially helpful because: (mark only one)

- It is the fastest suture to place
- It provides excellent wound edge eversion
- It causes minimal tissue tension
- It leaves no scar

1. How confident are you in your ability to describe when to use different suturing techniques? (mark only one)

- Not confident at all
- Slightly confident
- Moderate confident
- Very confident
- Extremely confident

1. How confident are you in your ability to use instrument tie? (mark only one)

- Not confident at all
- Slightly confident
- Moderately confident
- Very confident
- Extremely confident

1. How confident are you in your ability to do hand ties? (mark only one)

- Not confident at all
- Slightly confident
- Moderately confident
- Very confident
- Extremely confident

1. What specific knowledge or skulls do you hope to gain from the upcoming suturing and knot tying skill? _____________________________________

Basic surgical Skills Post-course Evaluation

1. Name/Code _______________
2. Level/year of study ________________
3. Which type of needle is best suited for suturing skin? (mark only one)

- Cutting
- Tapered
- Blunt
- Spatula

1. The horizontal mattress stitch is especially useful for? (mark only one)

- Cosmetic closure
- Areas under tension (e.g over joints)
- Vascular anastomosis
- Deep fascia closure

1. Which type of forceps is most appropriate for handling delicate tissue during suturing (mark only one)

- Adson forceps with teeth
- Allis clamp
- Towel clip
- Kocher clamp

1. The vertical mattress suture is especially helpful because: (mark only one)

- It is the fastest suture to place
- It provides excellent wound edge eversion
- It causes minimal tissue tension
- It leaves no scar

1. Rate your ability to describe when to use different suturing techniques after this session (mark only one)

- Poor
- Fair
- Good
- Very good
- Excellent

1. How confident do you feel about performing instrument tie after this skills session? (mark only one)

- Not confident at all
- Slightly confident
- Moderately confident
- Very confident
- Extremely confident

1. How confident do you feel about performing hand tie after this skills session? (mark only one)

- Not confident at all
- Slightly confident
- Moderately confident
- Very confident
- Extremely confident

1. How effective do you believe the training was in enhamcing your knowledge and skills for performing instrument & hand tie? (mark only one)

- Not effective at all
- Slightly effective
- Moderately effective
- Very effective
- Extremely effective

1. Were there any specific challenges or difficulties you faced during the suturing and knot tying sessions? If yes, please describe. _______________________________
2. The session effectively covered the objectives shared in the pre-reading materials (mark only one)

- Strongly disagree
- Disagree
- Neutral
- Agree
- Strongly agree

1. What aspects of the simulation session did you find most beneficial? _____________________
2. Please provide any feedback or suggestions regarding the global surgbox and simulation session ____________________________________________________
